# Supplementary material
Source: publisher site journal article supplement (http://content.karger.com/ProdukteDB/miscArchiv/000/207/516/Suppl.Material.pdf)
Supplement: Supplementary file 1 [file Suppl.Material.pdf]

# Supplementary Figure 1

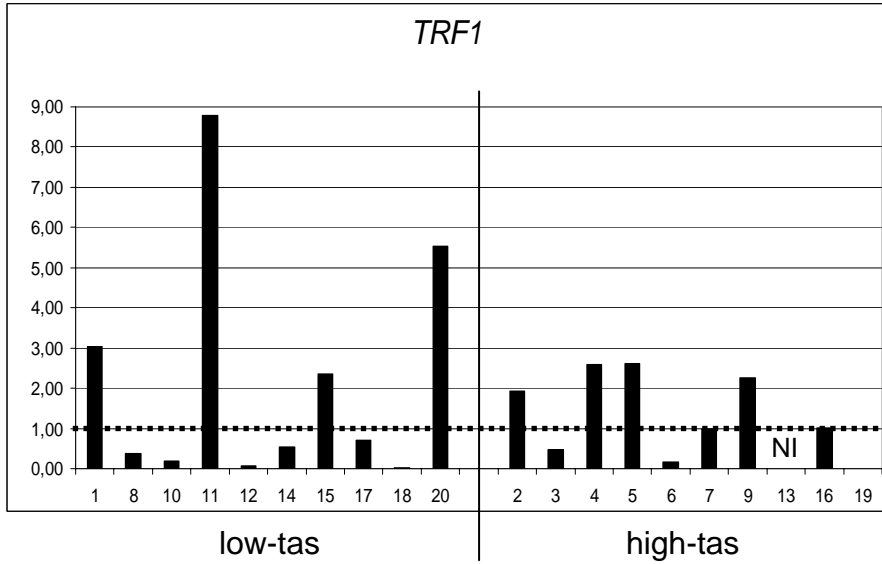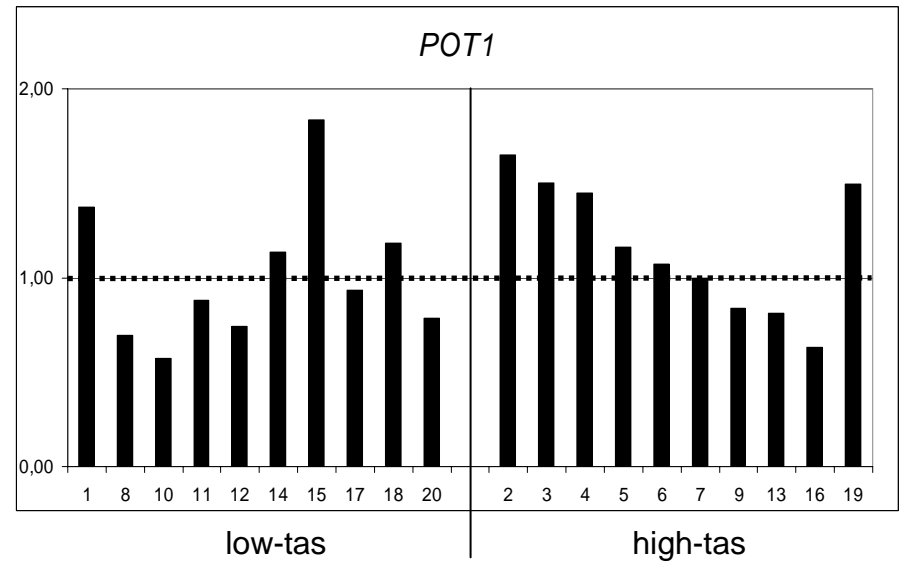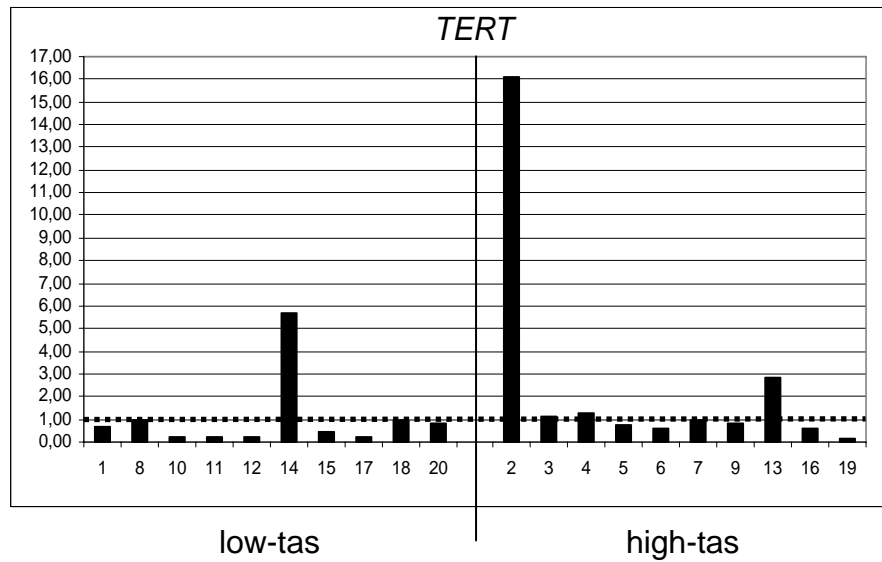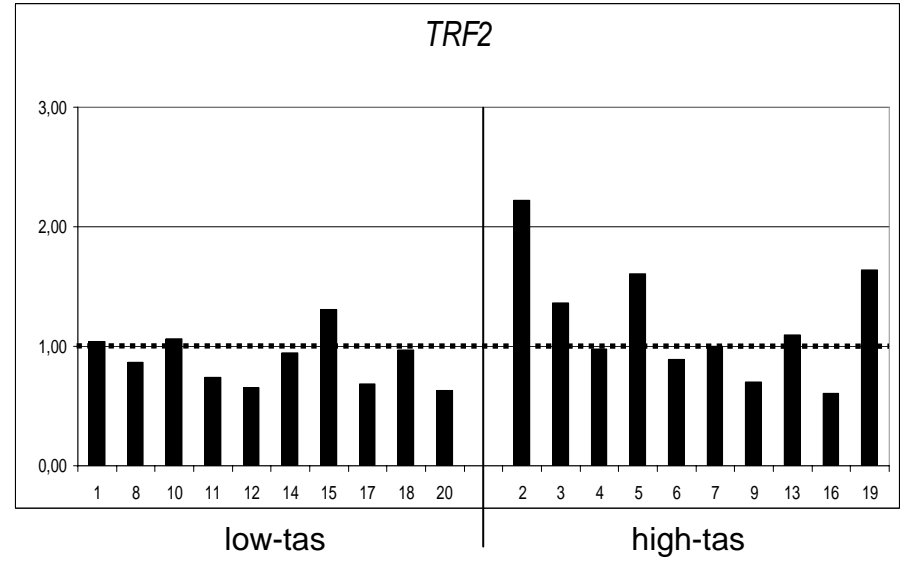

**Supplementary Table 1.** Clonal chromosome aberrations other than tas in short-term cultured giant cell tumors of bone

| Case No. | Karyotype                                                                                                                                                                                                                              |
|----------|----------------------------------------------------------------------------------------------------------------------------------------------------------------------------------------------------------------------------------------|
| Case 2   | 46,XX,t(4;19)(p11;q13)[6]/45-46,XX,del(11)(p11)[cp3]                                                                                                                                                                                   |
| Case 3   | 45,XX,der(5)t(5;7)(q11;p11),dic(7;11)(p11;q11),der(13)t(5;13)(q11;q14),der(14)t(11;14)(q11;q13)[cp43]/90-92,idemx2[4]/45,idem,add(11)(p15),add(22)(q13)[cp3]/45-46,XX,ins(1;1)(q44;q32q21)[5]/45,XX,del(1)(q32),dic(12;20)(p11;p13)[2] |
| Case 4   | 41-92<2n>,XX,del(11)(p11)[cp4]/45,XX,-1[3]/46-92<2n>,XX,del(11)(p13)[cp2]/46-87<2n>,XX,t(1;7)(p36;q11)[cp2]/46,XX,t(14;17)(q32;q21)[2]                                                                                                 |
| Case 6   | 46,XX,t(5;8)(q35;q22)[4]                                                                                                                                                                                                               |
| Case 7   | 45-47,XY,+r[cp4]                                                                                                                                                                                                                       |
| Case 13  | 46,XY,del(7)(p11p21)[6]/46,idem,add(22)(q13)[2]                                                                                                                                                                                        |
| Case 19  | 26-46,XY,der(8)t(8;21)(p23;q11),r(11)(p15q25)[cp5]/79-87,idemx2[cp2]                                                                                                                                                                   |
